# Supplementary material for: Importance of the RNA secondary structure for the relative accumulation of clustered viral microRNAs
Source: PubMed Central journal article supplement (PMC4081064; doi:10.1093/nar/gku424), 2014-05-15

# **Importance of the RNA secondary structure for the relative accumulation of clustered viral microRNAs**

## **SUPPLEMENTARY DATA**

Maud Contrant<sup>#</sup>, Aurélie Fender<sup>#\*</sup>, Béatrice Chane-Woon-Ming, Ramy Randrianjafy, Valérie Vivet-Boudou, Delphine Richer and Sébastien Pfeffer<sup>\*</sup>

Architecture et Réactivité de l'ARN – UPR 9002, Institut de Biologie Moléculaire et Cellulaire du CNRS, Université de Strasbourg, 15 rue René Descartes, F-67084 Strasbourg Cedex, France.

<sup>#</sup> These authors equally contributed to the work.

<sup>\*</sup> To whom correspondence should be addressed.

E-mail: [s.pfeffer@ibmc-cnrs.unistra.fr](mailto:s.pfeffer@ibmc-cnrs.unistra.fr); [a.fender@ibmc-cnrs.unistra.fr](mailto:a.fender@ibmc-cnrs.unistra.fr)

Fax: 33 3 88 60 22 18

## **Supplementary Material and methods**

### *Determination of KSHV genomic DNA sequence.*

After extraction using Tri-reagent (MRC, Inc), 25 ng of genomic DNA (BC-3; BCBL-1; DG-75-K10/12) were used to PCR amplify the KSHV genomic region (119270-121967) in 25  $\mu$ L containing 1 U of Phusion enzyme (Finzyme), 1x HF Phusion buffer (Finzyme), and 0.5  $\mu$ M of forward primer 21.119 and reverse primer 24.91 as follows: 30'' at 98°C, followed by 35 cycles of 10'' at 98°C, 30'' at 55°C, 2 min at 72°C and a final 5 min at 72°C. The PCR products were purified on a 1% agarose gel and sequenced by GATC Biotech (France).

**Table S1. Sequences of the oligonucleotides used in this study.**

| <b>Name</b>                           | <b>Sequence (5' to 3')</b>                                       | <b>Usage</b>                                                    |
|---------------------------------------|------------------------------------------------------------------|-----------------------------------------------------------------|
| <i>RNA preparation</i>                | GAAATTAATACGACTCACTATAGAATGCGTGC                                 | forward primer                                                  |
|                                       | TTCTGTTTGAAGG                                                    |                                                                 |
|                                       | TTTACCGAAACCACCCAGAGGC                                           | reverse primer                                                  |
| <i>Sequencing of KSHV genomic DNA</i> | TCAGCTAGGCCTCAGTATTCTA                                           | reverse primer                                                  |
|                                       | ACAGAACAATAACGGGCGACTAG                                          | reverse primer                                                  |
|                                       | CAGGATAGCCACCCACAATTG                                            | reverse primer                                                  |
|                                       | GTATTTACATCTACGGACCCCC                                           | reverse primer                                                  |
|                                       | CAATCAGCTTGGGAGTTCTAG                                            | reverse primer                                                  |
|                                       | GAAATTAATACGACTCACTATAGGACCGTGAG                                 | forward primer                                                  |
|                                       | CGACTCGAAAAAT                                                    |                                                                 |
|                                       |                                                                  |                                                                 |
| <i>Mutagenesis</i>                    | GCGTCTGGATCGACACAAACCCTGCGCGGGTT                                 | forward for insertion of pre-K9 module into pre-K6 module frame |
|                                       | TCCCAGCTGGGTCTACCCAGCTGCGTAAACCC                                 |                                                                 |
|                                       | CGCTGCGTAAACACAGCTGGG                                            |                                                                 |
|                                       | GAAGAACACACAGAACAATAACGGGCGACTA                                  | reverse for insertion of pre-K9 module into pre-K6 module frame |
|                                       | GATCCCAGCCGGGTTTACGCAGCTGCGTATAC                                 |                                                                 |
|                                       | CCAGCTGTGTTTACGCAGCGGG                                           |                                                                 |
|                                       | GCTGAGTCATCGCAGCCCCTATTCCAGTAGGT                                 | forward for insertion of pre-K6 module into pre-K9 module frame |
|                                       | ATAAGAAAGACTTGTCCAGCAGCACCTAATCC                                 |                                                                 |
|                                       | ATCGGCGGTGCGGGCTGATG                                             |                                                                 |
|                                       | CCTTGTTTAATTGTAGAATTACAGCTGGATTTA                                | reverse for insertion of pre-K6 module into pre-K9 module frame |
| AAAAAGACTCGCTCAACAGCCC GAAAACCATC     |                                                                  |                                                                 |
| AGCCCGCACCCCGATGGATTAG                |                                                                  |                                                                 |
| GCTGAGTCATCGCAGCCCCTATTCCAGTAGGT      | forward for deletion of pre-K9 module                            |                                                                 |
| ATATAAATCCAGCTGTAATTCTACAATTAAC       |                                                                  |                                                                 |
| AAGG                                  |                                                                  |                                                                 |
| CCTTGTTTAATTGTAGAATTACAGCTGGATTTA     | reverse for deletion of pre-K9 module                            |                                                                 |
| TATACCTACTGGAATAGGGGCTGCGATGACTC      |                                                                  |                                                                 |
| AGC                                   |                                                                  |                                                                 |
| GCGTCTGGATCGACACAAACCCTGCGCGGGTT      | forward for deletion of pre-K6 module                            |                                                                 |
| TATCTAGTCGCCGTTATTGTTCTGTGTGTTCT      |                                                                  |                                                                 |
| TC                                    |                                                                  |                                                                 |
| GAAGAACACACAGAACAATAACGGGCGACTA       | reverse for deletion of pre-K6 module                            |                                                                 |
| GATAAACCCGCGCAGGGTTTGTGTCGATCCAG      |                                                                  |                                                                 |
| ACGC                                  |                                                                  |                                                                 |
| GGAATCCTACCTCCACGCTCGCGTATGCCTCA      | forward for insertion of pre-K9 module into pre-K11 module frame |                                                                 |
| TGCCAGCTGGGTCTACCCAGCTGCGTAAACC       |                                                                  |                                                                 |
| CCGCTGCGTAAACACAGCTGG                 |                                                                  |                                                                 |

|                                                                                                        |                                                                  |
|--------------------------------------------------------------------------------------------------------|------------------------------------------------------------------|
| GGTCGGGAACCCGCCGCGCTTCCGCAAGGCA<br>CCCAGCCGGGTTTACGCAGCTGCGTATACCA<br>GCTGTGTTTACGCAGCGGGG             | reverse for insertion of pre-K9 module into pre-K11 module frame |
| GCTGAGTCATCGCAGCCCCTATTCCAGTAGGT<br>ATACGAGGTTTCGCTTTGGTCACAGCTTAAACA<br>TTTCTAGGGCGGTGTTATGATCCTTAATG | forward for insertion of pre-K11 module into pre-K9 module frame |
| CCTTGTTTAATTGTAGAATTACAGCTGGATTTA<br>CGGGGCCGCATCGGACACAGGCTAAGCATTAA<br>GGATCATAACACCGCCCTAG          | reverse for insertion of pre-K11 module into pre-K9 module frame |
| GGAATCCTACCTCCACGCTCGCGTATGCCTCA<br>TGTGCCTTGCGBAAGCGCGGGCGGGTTCCCGA<br>CC                             | forward for deletion of pre-K11 module                           |
| GGTCGGGAACCCGCCGCGCTTCCGCAAGGCA<br>CATGAGGCATACGCGAGCGTGGAGGTAGGATT<br>CC                              | reverse for deletion of pre-K11 module                           |
| CGACACAAACCCTGCGCGGGTTTAGAAAGACT<br>TGTTAGGTAGTCCCTAGTGCCCTAAGGGTCTA<br>CATCAAGCACTTAGG                | forward for insertion of pre-K5 into pre-K6 frame                |
| CAGAACAATAACGGGCGACTAGATAAAAAGA<br>CTCGACCGCAAGTTCCAGGCATCCTAAGTGC<br>TTGATGTAGACCCTTAGG               | reverse for insertion of pre-K5 into pre-K6 frame                |
| GGGCACGGCGTCATGACTAAGGGGGAGTTTGA<br>CCCAGCAGCACCTAATCCATCGGCGGTGCGG<br>GCTGATGG                        | forward for insertion of pre-K6 into pre-K5 frame                |
| GTGGCACCAGGTTATGGTCTTATGAGCGGGCT<br>TGCTCAACAGCCCAAAACCATCAGCCCGCAC<br>CGCCGATGGATTAGG                 | reverse for insertion of pre-K6 into pre-K5 frame                |
| GGGCACGGCGTCATGACTAAGGGGGAGTTTGA<br>CCCAAGCCCGCTCATAAGACCATAACCTGGTG<br>CCAC                           | forward for deletion of pre-K5                                   |
| GTGGCACCAGGTTATGGTCTTATGAGCGGGCT<br>TGGGTCAAACCTCCCCCTTAGTCATGACCCGT<br>GCC                            | reverse for deletion of pre-K5                                   |
| CGACACAAACCCTGCGCGGGTTTAGAAAGACT<br>TGTCGAGTCTTTTTATCTAGTCGCCGTTATTG<br>TTCTG                          | forward for deletion of pre-K6                                   |
| CAGAACAATAACGGGCGACTAGATAAAAAGA<br>CTCGACAAGTCTTTCTAAACCCGCGCAGGGTT<br>TGTGTCG                         | reverse for deletion of pre-K6                                   |
| CGCTCGCGTATGCCTCATGCGAGGTTTCGCTTTT<br>AGGTAGTCCCTAGTGCCCTAAGGGTCTACATC<br>AAGCACTTAGG                  | forward for insertion of pre-K5 into pre-K11 frame               |
| CCCGCCGCGCTTCCGCAAGGCACGGGGCCGC<br>AACCGCAAGTTCCAGGCATCCTAAGTGCTTG<br>ATGTAGACCCTTAGG                  | reverse for insertion of pre-K5 into pre-K11 frame               |



|                                                                                                                      |                                                        |
|----------------------------------------------------------------------------------------------------------------------|--------------------------------------------------------|
| GGGCACGGCGTCATGACTAAGGGGGAGTTTGA<br>CCGGTCACAGCTTAAACATTTCTAGGGCGGTG<br>TTATGATCCTTAATGC                             | forward for insertion of pre-<br>K11 into pre-K5 frame |
| GTGGCACCAGGTTATGGTCTTATGAGCGGGCT<br>TGTCGGACACAGGCTAAGCATTAAGGATCATA<br>ACACCGCCC                                    | reverse for insertion of pre-<br>K11 into pre-K5 frame |
| CGCTCGCGTATGCCTCATGCGAGGTTGCTTTT<br>GCGGCCCCGTGCCTTGCGGAAGCGCGGGCGGG                                                 | forward for deletion of pre-<br>K11                    |
| CCCGCCCGCGCTTCCGCAAGGCACGGGGCCGC<br>AAAAGCGAACCTCGCATGAGGCATACGCGAG<br>CG                                            | reverse for deletion of pre-<br>K11                    |
| CTTCGCTAACTGTAGTCCGGGTCGATCTGACC<br>ATTGAAGCAATCCAGATCTTCCAGGGCTAGAG<br>CTGCCGCG                                     | forward mutant A                                       |
| CGCGGCAGCTCTAGCCCTGGAAGATCTGGATT<br>GCTTCAATGGTCAGATCGACCCGGACTACAGT<br>TAGCGAAG                                     | reverse mutant A                                       |
| CTTCCAGATCTTCCAGGGCTAGAGCTGGCGAA<br>GTAGACCCAATTATAGAAATTTGGTCCCCAAA<br>CTCC                                         | forward mutant B                                       |
| GGAGTTTGGGGACCAAATTTCTATAATTGGGT<br>CTACTTCGCCAGCTCTAGCCCTGGAAGATCTG<br>GAAG                                         | reverse mutant B                                       |
| GCACTTAGGATGCCTGGAACCTGCCGGTCAAA<br>CTCCCCATAAGACCATAACCTGGTGCCACAA<br>AAACC                                         | forward mutant D                                       |
| GGTTTTTGTGGCACCAGGTTATGGTCTTATGGG<br>GGAGTTTGACCGGCAAGTTCAGGCATCCTAA<br>GTGC                                         | reverse mutant D                                       |
| GGGTCTACCCAGCTGCGTAAACCCCGCTGCC<br>GTAAACAAACAGCTGGGTATACGCAGCTGCGT<br>AAACCCG                                       | forward mutant E                                       |
| CGGGTTTACGCAGCTGCGTATACCCAGCTGTT<br>TGTTTACGGGCAGCGGGGTTTACGCAGCTGGG<br>TAGACCC                                      | reverse mutant E                                       |
| GAGTCATCGCAGCCCCTATTCCAGTAGGTATG<br>ACACAAACCCTGCGCGGGTTTGCCAGCTGGGT<br>CTACCCAGCTGCGTAAACCCCGCTGCGTAAAC<br>ACAG     | forward mutant F                                       |
| GTTTAATTGTAGAATTACAGCTGGATTTAGGG<br>CGACTAGATGCCAGCCGGGTTTACGCAGCTGC<br>GTATACCCAGCTGTGTTTACGCAGCGGGGTTT<br>AC       | reverse mutant F                                       |
| GAGTCATCGCAGCCCCTATTCCAGTAGGTATG<br>ACACAAACCCTGCGCGGGTTTGCCAGCTGGGT<br>CTACCCAGCTGCGTAAACCCCGCTGCCCGTAA<br>ACAAACAG | forward mutant G                                       |

|                 |                                                                                                                       |                     |
|-----------------|-----------------------------------------------------------------------------------------------------------------------|---------------------|
|                 | GTTTAATTGTAGAATTACAGCTGGATTTAGGG<br>CGACTAGATGCCAGCCGGGTTTACGCAGCTGC<br>GTATACCCAGCTGTTTGTTCACGGGCAGCGGG<br>GTTTAC    | reverse mutant G    |
|                 | AGATTAAGATTATAATGGGTCTACTTCGCTTG<br>GAAAGACTTGAAGTGTAGTCCGGGTCGATCTG<br>AGCCATTGAAGCAAGCTTCCAG                        | forward mutant H    |
|                 | GGACCAAATTTCTATAATTGGTGTACCCGCGG<br>AAAAAGACTCGCAGCTCTAGCCCTGGAAGATC<br>TGGAAGCTTGCTTCAATGGCTCAG                      | reverse mutant H    |
|                 | AGATTAAGATTATAATGGGTCTACTTCGCTTG<br>GAAAGACTTGAAGTGTAGTCCGGGTCGATCTG<br>ACCATTGAAGCAATCCAG                            | forward mutant I    |
|                 | GGACCAAATTTCTATAATTGGTGTACCCGCGG<br>AAAAAGACTCGCAGCTCTAGCCCTGGAAGATC<br>TGGATTGCTTCAATGGTCAGATCG                      | reverse mutant I    |
|                 | AGATTAAGATTATAATGGGTCTACTTCGCTGA<br>CACAAACCCTGCGCGGGTTTGAAAGACTTGA<br>ACTGTAGTCCGGGTCGATCTGAGCCATTGAAG<br>CAAGCTTCC  | forward mutant J    |
|                 | GGACCAAATTTCTATAATTGGTGTACCCGCGG<br>GGGCGACTAGATAAAAAGACTCGCAGCTCTAG<br>CCCTGGAAGATCTGGAAGCTTGCTTCAATGGC<br>TCAGATC   | reverse mutant J    |
|                 | AGATTAAGATTATAATGGGTCTACTTCGCTGA<br>CACAAACCCTGCGCGGGTTTGAAAGACTTGA<br>ACTGTAGTCCGGGTCGATCTGACCATTGAAGC<br>AATCC      | forward mutant K    |
|                 | GGACCAAATTTCTATAATTGGTGTACCCGCGG<br>GGGCGACTAGATAAAAAGACTCGCAGCTCTAG<br>CCCTGGAAGATCTGGATTGCTTCAATGGTCAG<br>ATCGAC    | reverse mutant K    |
|                 | CGGCGTCATGACTAAGGGGGAGTTTGACCTTG<br>GAAAGACTTGAGGTAGTCCCTAGTGCCCTAAG<br>GGTCTACATCAAGCACTTAGG                         | forward mutant L    |
|                 | CACCAGGTTATGGTCTTATGAGCGGGCTTGAA<br>AAAGACTCGACCGGCAAGTTCAGGCATCCTA<br>AGTGCTTGATGTAGACCCTTAG                         | reverse mutant L    |
|                 | CGGCGTCATGACTAAGGGGGAGTTTGACCTGA<br>CACAAACCCTGCGCGGGTTTGAAAGACTTGA<br>GGTAGTCCCTAGTGCCCTAAGGGTCTACATCA<br>AGCACTTAGG | forward mutant M    |
|                 | CACCAGGTTATGGTCTTATGAGCGGGCTTGGG<br>GCGACTAGATAAAAAGACTCGACCGGCAAGTT<br>CCAGGCATCCTAAGTGCTTGATGTAGACCCTT<br>AG        | reverse mutant M    |
| <i>Northern</i> | GCTTACACCCAGTTTCCTGTAAT                                                                                               | probe for miR-K1-5p |

|               |                           |                                                                                    |
|---------------|---------------------------|------------------------------------------------------------------------------------|
| <b>probes</b> |                           |                                                                                    |
|               | CAGATCGACCCGGACTACAGTT    | probe for miR-K2-5p                                                                |
|               | TCGCTGCCGTCCTCAGAATGTGA   | probe for miR-K3-5p                                                                |
|               | CCTAGAGTACTGCGGTTTAGCT    | probe for miR-K4-5p                                                                |
|               | TCAGCTAGGCCTCAGTATTCTA    | probe for miR-K4-3p                                                                |
|               | CCGGCAAGTTCCAGGCATCCTA    | probe for miR-K5-3p                                                                |
|               | CCGATGGATTAGGTGCTGCTGG    | probe for miR-K6-5p                                                                |
|               | CTCAACAGCCCGAAAACCATCA    | probe for miR-K6-3p                                                                |
|               | AGCGCCAGCAACATGGGATCA     | probe for miR-K7-3p                                                                |
|               | CGTGCTCTCTCAGTCGCGCCTA    | probe for miR-K8-3p                                                                |
|               | AGCGGGGTTTACGCAGCTGGGT    | probe for miR-K9-5p                                                                |
|               | TTACGCAGCTGCGTATACCCAG    | probe for miR-K9-3p                                                                |
|               | TCGGACACAGGCTAAGCATTA     | probe for miR-K11-3p                                                               |
|               | CGCCAATATTTACGTGCTGCTA    | probe for miR-16                                                                   |
|               | CGCCCGCATCCGGCCGTCCTG     | probe for moR-K1-5p                                                                |
|               | AGTTATACTGCCCGGTTCCA      | probe for moR-4-5p (LNA)                                                           |
|               | GGTCAAACCTCCCCCTTAGT      | probe for moR-5-5p                                                                 |
|               | TCCAGCGACACCCATTTAGT      | probe for moR-10-5p                                                                |
|               | CTAGCTAAACTGCAGTACTCTA    | probe for miR-AS-K4-5p                                                             |
|               | TGTACCCAGCTGCGTAAACCCCG   | probe for miR-AS-K9-5p                                                             |
|               | GCTAGGCGCGACTGAGAGAGC     | probe for miR-AS-K8-5p                                                             |
|               |                           |                                                                                    |
| <b>SHAPE</b>  |                           | Coordinates according to the pri-miR-K10/12 <i>in vitro</i> transcript (1 to 3157) |
| N             | GACTTTCGCGCCGGGAACAC      | 247 - 266                                                                          |
| M             | CACAGGCATTGTAGCTGTTGCG    | 424 - 444                                                                          |
| L             | TCAGCTAGGCCTCAGTATTCTA    | 624 - 645                                                                          |
| K             | TTGTGGCACCAGGTTATGGTC     | 813 - 833                                                                          |
| J             | CCCGCATGGTGTCAAATTAG      | 1060 - 1079                                                                        |
| I             | ACAGAACAATAACGGGCGACTAG   | 1312 - 1334                                                                        |
| H             | CTCATGGGTATTGGACTTGTAGGC  | 1563 - 1586                                                                        |
| G             | CAGGATAGCCACCCACAATTG     | 1817 - 1837                                                                        |
| F             | ACGATAACCATACATGGATACACGG | 1933 - 1957                                                                        |
| E             | ATAAAAGGATTAGCGCATGC      | 2192 - 2211                                                                        |
| D             | ATTAGCAAATTCAAGATGGCGG    | 2354 - 2375                                                                        |
| C             | CAATCAGCTTGGGAGTTCTAG     | 2550 - 2570                                                                        |
| B             | TGCCTTATTTGGTAATGCTTCCGG  | 2834 - 2857                                                                        |

**Table S2. Annotation of deep-sequenced small RNA libraries.**

| <b>2mm max</b>             | <b>DG-75-K10/12</b> |               | <b>BCBL-1</b>     |               | <b>BC-3</b>       |               |
|----------------------------|---------------------|---------------|-------------------|---------------|-------------------|---------------|
|                            | <b>Read count</b>   | <b>Read %</b> | <b>Read count</b> | <b>Read %</b> | <b>Read count</b> | <b>Read %</b> |
| <b>total</b>               | 60082452            | 100.00        | 52392539          | 100.00        | 59373221          | 100.00        |
| <b>filtered out</b>        | 139552              | 0.23          | 204917            | 0.39          | 224929            | 0.38          |
| <b>after preprocessing</b> | 59942900            | 99.77         | 52187622          | 99.61         | 59148292          | 99.62         |
| <b>unmapped</b>            | 5528858             | 9.20          | 5418623           | 10.34         | 4824088           | 8.13          |
| <b>hsa miRNAs</b>          | 34843255            | 57.99         | 24829414          | 47.39         | 16285781          | 27.43         |
| <b>kshv miRNAs</b>         | 5584959             | 9.30          | 4881657           | 9.32          | 26340822          | 44.36         |
| <b>hsa other RNAs</b>      | 4257971             | 7.09          | 9045232           | 17.26         | 6493445           | 10.94         |
| <b>unannotated</b>         | 9727857             | 16.19         | 8012696           | 15.29         | 5204156           | 8.77          |
| <b>total miRNAs</b>        | 40428214            | 67.29         | 29711071          | 56.71         | 42626603          | 71.79         |

**Table S3. Major KSHV miRNA-5p and -3p sequences obtained by deep sequencing.**

For each miRNA, the major sequence obtained by deep sequencing and its fraction (among all the sequences retrieved for the given miRNA) is shown. In bold are indicated the residues in the sequenced RNA species that are different from the sequence reported in miRBase v.19 ([www.mirbase.org](http://www.mirbase.org)) and that correspond or not (underlined) to the KSHV genomic sequence.

| KSHV miRNAs       | Cell lines   | Most Abundant Sequence (MAS)              | Seq ratio | MAS Fraction |
|-------------------|--------------|-------------------------------------------|-----------|--------------|
| <b>K1-5p</b>      | DG-75-K10/12 | ATTACAGGAAACTGGGTGTAAGC                   | 18064.30  | 36.87        |
|                   | BCBL-1       | ATTACAGGAAACTGGGTGTAAG-                   | 12639.70  | 27.34        |
|                   | BC-3         | ATTACAGGAAACTGGGTGTAAG <b>C</b> T         | 32260.60  | 23.79        |
| <b>K1-3p</b> (*)  | DG-75-K10/12 | GCAGCACCTGTTTCCTGCAACC                    | 6.48      | 70.99        |
|                   | BCBL-1       | GCAGCACCTGTTTCCTGCAACC                    | 0.54      | 56.25        |
|                   | BC-3         | GCAGCACCTGTTTCCTGCAACC                    | 16.77     | 46.85        |
| <b>K2-5p</b>      | DG-75-K10/12 | AACTGTAGTCCGGGTCGATCTG                    | 12303.90  | 39.22        |
|                   | BCBL-1       | AACTGTAGTCCGGGTCGATCTG                    | 8282.47   | 25.35        |
|                   | BC-3         | AACTGTAGTCCGGGTCGATCTG                    | 16407.20  | 31.44        |
| <b>K2-3p</b> (*)  | DG-75-K10/12 | GATCTTCCAGGGCTAGAGCTG <b>T</b>            | 69.70     | 31.48        |
|                   | BCBL-1       | GATCTTCCAGGGCTAGAGCTG <b>T</b>            | 41.77     | 37.23        |
|                   | BC-3         | GATCTTCCAGGGCTAGAGCTG <b>T</b>            | 126.48    | 52.95        |
| <b>K3-5p</b>      | DG-75-K10/12 | TCACATTCTGAGGACGGCAGCGA                   | 42653.80  | 52.73        |
|                   | BCBL-1       | TCACATTCTGAGGACGGCAGCGA                   | 27750.30  | 49.30        |
|                   | BC-3         | TCACATTCTGAGGACGGCAGCGA                   | 142456.00 | 49.16        |
| <b>K3-3p</b> (*)  | DG-75-K10/12 | TCGCGGTCACAGAATGTGACA                     | 521.06    | 57.20        |
|                   | BCBL-1       | TCGCGGTCACAGAATGTGACA                     | 229.63    | 62.79        |
|                   | BC-3         | TCGCGGTCACAGAATGTGACA                     | 1165.05   | 44.90        |
| <b>K4-5p</b>      | DG-75-K10/12 | AGCTAAACT <b>T</b> GCAGTACTCTAGG          | 5160.49   | 69.04        |
|                   | BCBL-1       | AGCTAAACCGCAGTACTCTAGG                    | 3049.87   | 60.70        |
|                   | BC-3         | AGCTAAACCGCAGTACTCTAGG                    | 14366.90  | 70.40        |
| <b>K4-3p</b>      | DG-75-K10/12 | TAGAG <b>T</b> ACTGAGGCCTAGCTGA           | 30340.10  | 57.82        |
|                   | BCBL-1       | TAGAATACTGAGGCCTAGCTGA                    | 31102.10  | 60.89        |
|                   | BC-3         | TAGAATACTGAGGCCTAGCTGA                    | 133565.00 | 69.94        |
| <b>K5-5p</b> (*)  | DG-75-K10/12 | <b>T</b> AGGTAGTCCCT <b>A</b> GTGCCCTAAG- | 39.25     | 37.43        |
|                   | BCBL-1       | <b>T</b> AGGTAGTCCCT <b>A</b> GTGCCCTAAG- | 30.22     | 33.18        |
|                   | BC-3         | <b>T</b> AGGTAGTCCCT <b>A</b> GTGCCCTAAG- | 90.66     | 29.16        |
| <b>K5-3p</b>      | DG-75-K10/12 | TAGGATGCCTGGAAC <b>T</b> TGCCGGT          | 1452.17   | 68.71        |
|                   | BCBL-1       | TAGGATGCCTGGAAC <b>T</b> TGCCGGT          | 3357.38   | 61.02        |
|                   | BC-3         | TAGGATGCCTGGAAC <b>T</b> TGCCGGT          | 6213.66   | 67.36        |
| <b>K6-5p</b>      | DG-75-K10/12 | CCAGCAGCACCTAATCCATCGG                    | 769.63    | 41.88        |
|                   | BCBL-1       | CCAGCAGCACCTAATCCATCGG                    | 1094.09   | 46.88        |
|                   | BC-3         | CCAGCAGCACCTAATCCATCGG                    | 2791.27   | 37.84        |
| <b>K6-3p</b>      | DG-75-K10/12 | TGATGGTTTTTCGGGCTGTTGAG                   | 9787.47   | 41.78        |
|                   | BCBL-1       | TGATGGTTTTTCGGGCTGTTGAG                   | 18510.50  | 46.04        |
|                   | BC-3         | TGATGGTTTTTCGGGCTGTTGAG                   | 41826.80  | 51.86        |
| <b>K11-5p</b> (*) | DG-75-K10/12 | GGTCACAGCTTAAACATTTCTAG <b>G</b>          | 0.05      | 50.00        |
|                   | BCBL-1       | GGTCACAGCTTAAACATTTCTAG <b>G</b>          | 2.29      | 48.53        |
|                   | BC-3         | GGTCACAGCTTAAACATTTCTAG <b>G</b>          | 178.33    | 49.70        |
| <b>K11-3p</b>     | DG-75-K10/12 | TTAATGCTTAGCCTGTGTCCGA                    | 77.81     | 47.55        |
|                   | BCBL-1       | TTAATGCTTAGCCTGTGTCCGA                    | 18684.50  | 51.69        |
|                   | BC-3         | TTAATGCTTAGCCTGTGTCCGA                    | 65499.20  | 63.19        |
| <b>K7-5p</b> (*)  | DG-75-K10/12 | AGCGCCACCGGACGGGGATTTAT--                 | 88.94     | 31.31        |
|                   | BCBL-1       | <b>T</b> GAGCGCCACCGGACGGGGAT-----        | 133.95    | 21.01        |
|                   | BC-3         | AGCGCCACCGGACGGGGATTTA---                 | 1815.85   | 25.44        |

|                    |              |                                   |          |       |
|--------------------|--------------|-----------------------------------|----------|-------|
| <b>K7-3p</b>       | DG-75-K10/12 | TGATCCCATGTTGCTGGCGCT <b>TCA</b>  | 6002.93  | 35.26 |
|                    | BCBL-1       | TGATCCCATGTTGCTGGCGCT             | 16548.00 | 50.26 |
|                    | BC-3         | TGATCCCATGTTGCTGGCGCT             | 62372.80 | 45.93 |
| <b>K8-5p (*)</b>   | DG-75-K10/12 | ACTCCCTCACTAACGCCCCGCT            | 1081.09  | 53.65 |
|                    | BCBL-1       | ACTCCCTCACTAACGCCCCGCT            | 1617.99  | 47.21 |
|                    | BC-3         | ACTCCCTCACTAACGCCCCGCT            | 6386.01  | 64.02 |
| <b>K8-3p</b>       | DG-75-K10/12 | CTAGGCGGCGACTGAGAGAG <b>CAC</b>   | 8069.62  | 38.98 |
|                    | BCBL-1       | CTAGGCGGCGACTGAGAGAGCA            | 8744.79  | 23.41 |
|                    | BC-3         | CTAGGCGGCGACTGAGAGAGCA            | 27914.30 | 31.12 |
| <b>K9-5p (*)</b>   | DG-75-K10/12 | ACCCAGCTGCGTAAACCCCGCT            | 988.91   | 35.39 |
|                    | BCBL-1       | ACCCAGCTGCGTAAACCCCGCT            | 1764.43  | 28.79 |
|                    | BC-3         | <b>ATCCAG-TAGGTATACCCAGGT</b>     | 0.00     | 0.00  |
| <b>K9-3p</b>       | DG-75-K10/12 | CTGGGTATACGCAGCTGCGTAA            | 621.40   | 58.02 |
|                    | BCBL-1       | CTGGGTATACGCAGCTGCGTAA            | 551.54   | 35.15 |
|                    | BC-3         | CTGGGTATAC <b>CC</b> AGCTGCGTAA   | 0.00     | 0.00  |
| <b>K10a-5p (*)</b> | DG-75-K10/12 | GGCTTGGGGCGATACCACCACT            | 0.37     | 80.00 |
|                    | BCBL-1       | GGCTTGGGGCGATACCACCACT            | 27.90    | 76.60 |
|                    | BC-3         | GGCTTGGGGCGATACCACCACT            | 443.96   | 69.38 |
| <b>K10a-3p</b>     | DG-75-K10/12 | TAGTGTGTGTTTTCCCGAGTGG-           | 20.97    | 21.93 |
|                    | BCBL-1       | TAGTGTGTGTTTTCCCGAGTGG-           | 7121.24  | 24.21 |
|                    | BC-3         | TAGTGTGTGTTTTCCCGAGTGGC           | 29644.50 | 22.32 |
| <b>K12-5p (*)</b>  | DG-75-K10/12 | <b>TCAACCAGGCCACCATTCCCTCT---</b> | 2.05     | 20.48 |
|                    | BCBL-1       | <b>TCAACCAGGCCACCATTCCCTCT---</b> | 528.92   | 19.45 |
|                    | BC-3         | <b>TCAACCAGGCCACCATTCCCTCT---</b> | 3374.21  | 22.66 |
| <b>K12-3p</b>      | DG-75-K10/12 | TGGGGGAGGGTGCCCTGGTTGA            | 22.61    | 47.05 |
|                    | BCBL-1       | TGGGGGAGGGTGCCCTGGTTGA            | 2492.99  | 43.92 |
|                    | BC-3         | TGGGGGAGGGTGCCCTGGTTGA            | 29025.00 | 50.92 |

**Table S4. IsomiRNAs, fraction in % of the different isoforms per miRNA.** The different categories correspond to: full length (fl), 3' or 5' trimmed (3trim or 5trim), 3' or 5' tailed (3add or 5add) and every possible combination (5trim3trim, 5trim3add, etc). The miRNAs were either identical (id) or different (iso) to the template sequence.

| DG-75-K10/12 (9mm max) |                                        |                  |       |        |          |           |         |          |          |           |               |                |              |               |         |          |              |               |             |              |
|------------------------|----------------------------------------|------------------|-------|--------|----------|-----------|---------|----------|----------|-----------|---------------|----------------|--------------|---------------|---------|----------|--------------|---------------|-------------|--------------|
| KSHV miRNA             | GenomicPosition (Ref:Start:End:Strand) | Total read count | fl_id | fl_iso | 3trim_id | 3trim_iso | 3add_id | 3add_iso | 5trim_id | 5trim_iso | 5trim3trim_id | 5trim3trim_iso | 5trim3add_id | 5trim3add_iso | 5add_id | 5add_iso | 5add3trim_id | 5add3trim_iso | 5add3add_id | 5add3add_iso |
| miR-K1-5p              | NC:009333.1:122137:122159:-            | 730361           | 36.87 | 7.2    | 9.97     | 2.64      | 32.82   | 8.77     | 0.37     | 0.07      | 0.12          | 0.02           | 0.77         | 0.21          | 0.01    | 0.07     | 0.01         | 0.02          | 0.02        | 0.07         |
| miR-K1-3p              | NC:009333.1:122100:122121:-            | 262              | 70.99 | 8.02   | 14.12    | 0         | 0       | 4.96     | 0        | 0         | 0             | 0              | 0            | 0             | 0       | 0        | 1.91         | 0             | 0           | 0            |
| miR-K2-5p              | NC:009333.1:121977:121998:-            | 497463           | 39.22 | 1.34   | 33.65    | 1.5       | 5.92    | 16.83    | 0.48     | 0.01      | 0.33          | 0.02           | 0.15         | 0.22          | 0.05    | 0.12     | 0.03         | 0.09          | 0           | 0.05         |
| miR-K2-3p              | NC:009333.1:121935:121955:-            | 2818             | 16.15 | 0.67   | 5.36     | 0.07      | 24.45   | 40.17    | 0.53     | 0.39      | 0             | 0              | 1.7          | 0.82          | 1.95    | 0.32     | 3.05         | 1.1           | 0.78        | 2.48         |
| miR-K3-5p              | NC:009333.1:121834:121856:-            | 1724546          | 52.73 | 1.22   | 5.57     | 0.43      | 23.86   | 11.81    | 0.9      | 0.03      | 0.09          | 0.01           | 0.46         | 0.27          | 0.82    | 0.29     | 0.65         | 0.06          | 0.49        | 0.32         |
| miR-K3-3p              | NC:009333.1:121794:121814:-            | 21067            | 57.2  | 2.64   | 13.02    | 1.05      | 0.2     | 2.63     | 0.9      | 0.1       | 0.07          | 0.02           | 0            | 0.07          | 13.64   | 1        | 6.56         | 0.71          | 0.01        | 0.16         |
| miR-K4-5p              | NC:009333.1:121703:121724:-            | 208645           | 0.16  | 69.19  | 0.05     | 26.27     | 0       | 0.96     | 0        | 1.06      | 0             | 0.5            | 0            | 0.02          | 0       | 0.15     | 0.01         | 1.65          | 0           | 0            |
| miR-K4-3p              | NC:009333.1:121665:121686:-            | 1226689          | 23.46 | 58.77  | 3.25     | 7.23      | 0.35    | 3.42     | 1.1      | 1.86      | 0.09          | 0.16           | 0.04         | 0.15          | 0.01    | 0.09     | 0            | 0.02          | 0           | 0.01         |
| miR-K5-5p              | NC:009333.1:121552:121574:-            | 1587             | 1.32  | 2.65   | 31.63    | 1.32      | 0       | 0.19     | 0        | 0         | 0             | 0              | 0            | 0             | 0.88    | 3.47     | 54.19        | 4.35          | 0           | 0            |
| miR-K5-3p              | NC:009333.1:121513:121535:-            | 58713            | 68.71 | 8.35   | 9.78     | 1.11      | 0.12    | 9.08     | 1.15     | 0.1       | 0.19          | 0              | 0            | 0.31          | 0.46    | 0.25     | 0.28         | 0.05          | 0           | 0.06         |
| miR-K6-5p              | NC:009333.1:121044:121065:-            | 31117            | 41.88 | 0.75   | 4.3      | 0.05      | 34.46   | 16.14    | 0.74     | 0.02      | 0.04          | 0              | 0.99         | 0.29          | 0       | 0.13     | 0.04         | 0             | 0.02        | 0.14         |
| miR-K6-3p              | NC:009333.1:121012:121033:-            | 395720           | 41.78 | 0.9    | 5.03     | 0.22      | 26.68   | 21.36    | 1.06     | 0.04      | 0.08          | 0              | 1.84         | 0.8           | 0.04    | 0.06     | 0            | 0             | 0.02        | 0.07         |
| miR-K11-5p             | NC:009333.1:120864:120887:-            | 2                | 0     | 50     | 0        | 0         | 50      | 0        | 0        | 0         | 0             | 0              | 0            | 0             | 0       | 0        | 0            | 0             | 0           | 0            |
| miR-K11-3p             | NC:009333.1:120827:120848:-            | 3146             | 47.55 | 15.38  | 15.77    | 2.92      | 9.28    | 7.31     | 0.16     | 0.06      | 0.06          | 0              | 0.6          | 0.06          | 0.48    | 0.16     | 0.13         | 0.06          | 0           | 0            |
| miR-K7-5p              | NC:009333.1:120644:120667:-            | 3596             | 24.89 | 3.62   | 51.64    | 2.17      | 0.5     | 5.17     | 0        | 0         | 0.42          | 0              | 0            | 0.81          | 0.03    | 0.03     | 7.62         | 3.11          | 0           | 0            |
| miR-K7-3p              | NC:009333.1:120608:120627:-            | 242706           | 0.91  | 0.18   | 0.71     | 0.01      | 69.52   | 27.17    | 0        | 0.01      | 0             | 0              | 0.8          | 0.22          | 0       | 0        | 0            | 0             | 0.04        | 0.41         |
| miR-K8-5p              | NC:009333.1:120233:120254:-            | 43710            | 53.65 | 1.81   | 12.22    | 1.16      | 19.49   | 9.85     | 0.46     | 0.03      | 0.19          | 0              | 0.12         | 0.13          | 0.34    | 0.35     | 0.04         | 0.06          | 0.08        | 0.02         |
| miR-K8-3p              | NC:009333.1:120194:120214:-            | 326265           | 17.78 | 0.28   | 10.17    | 0.76      | 39.74   | 21.86    | 1.23     | 0.03      | 0.44          | 0.02           | 5.63         | 1.8           | 0.01    | 0.08     | 0.02         | 0.04          | 0.01        | 0.11         |

|             |                             |       |       |      |       |      |      |       |      |      |      |      |      |      |      |      |       |       |   |      |
|-------------|-----------------------------|-------|-------|------|-------|------|------|-------|------|------|------|------|------|------|------|------|-------|-------|---|------|
| miR-K9-5p   | NC:009333.1:119586:119607:- | 39983 | 35.39 | 2.11 | 22.19 | 9.39 | 0.28 | 19.56 | 0.45 | 0.01 | 0.19 | 0.05 | 0    | 0.25 | 1.37 | 1.29 | 4.72  | 2.1   | 0 | 0.67 |
| miR-K9-3p   | NC:009333.1:119552:119573:- | 25124 | 58.02 | 3.37 | 21.96 | 0.53 | 6.09 | 3.41  | 3.73 | 0.05 | 0.92 | 0.11 | 1.05 | 0.19 | 0    | 0.53 | 0     | 0.02  | 0 | 0.02 |
| miR-K10a-5p | NC:009333.1:118116:118137:- | 15    | 80    | 6.67 | 0     | 6.67 | 0    | 0     | 6.67 | 0    | 0    | 0    | 0    | 0    | 0    | 0    | 0     | 0     | 0 | 0    |
| miR-K10a-3p | NC:009333.1:118076:118097:- | 848   | 20.87 | 8.25 | 23.7  | 5.54 | 0.12 | 6.13  | 0.24 | 0.12 | 0.12 | 0    | 0    | 0    | 9.67 | 5.31 | 12.03 | 6.6   | 0 | 1.3  |
| miR-K12-5p  | NC:009333.1:117835:117857:- | 83    | 0     | 0    | 4.82  | 7.23 | 0    | 1.2   | 1.2  | 0    | 0    | 0    | 0    | 0    | 0    | 0    | 69.88 | 15.66 | 0 | 0    |
| miR-K12-3p  | NC:009333.1:117798:117819:- | 914   | 47.05 | 9.08 | 18.16 | 2.3  | 0.33 | 20.46 | 0.11 | 0.11 | 0.22 | 0    | 0.66 | 0.22 | 0.44 | 0.33 | 0.22  | 0.11  | 0 | 0.22 |

### BCBL-1 (9mm max)

| KSHV miRNA | GenomicPosition (Ref:Start:End:Strand) | Total read count | fl_id | fl_iso | 3trim_id | 3trim_iso | 3add_id | 3add_iso | 5trim_id | 5trim_iso | 5trim_3trim_id | 5trim_3trim_iso | 5trim_3add_id | 5trim_3add_iso | 5add_id | 5add_iso | 5add3_trim_id | 5add3_trim_iso | 5add3_add_id | 5add3_add_iso |
|------------|----------------------------------------|------------------|-------|--------|----------|-----------|---------|----------|----------|-----------|----------------|-----------------|---------------|----------------|---------|----------|---------------|----------------|--------------|---------------|
| miR-K1-5p  | NC:009333.1:122137:122159:-            | 375567           | 26.34 | 7.07   | 34.93    | 2.13      | 24.43   | 3.23     | 0.35     | 0.11      | 0.51           | 0.03            | 0.57          | 0.05           | 0.01    | 0.07     | 0.02          | 0.06           | 0.01         | 0.06          |
| miR-K1-3p  | NC:009333.1:122100:122121:-            | 16               | 56.25 | 18.75  | 25       | 0         | 0       | 0        | 0        | 0         | 0              | 0               | 0             | 0              | 0       | 0        | 0             | 0              | 0            | 0             |
| miR-K2-5p  | NC:009333.1:121977:121998:-            | 246100           | 25.35 | 0.87   | 44.77    | 5.4       | 3.04    | 19.07    | 0.31     | 0.01      | 0.42           | 0.07            | 0.08          | 0.22           | 0.03    | 0.07     | 0.07          | 0.18           | 0            | 0.04          |
| miR-K2-3p  | NC:009333.1:121935:121955:-            | 1241             | 25.54 | 0.32   | 11.76    | 0.56      | 7.01    | 43.03    | 1.69     | 0.08      | 0.56           | 0               | 1.13          | 2.01           | 0       | 0.56     | 3.95          | 0.16           | 0            | 1.61          |
| miR-K3-5p  | NC:009333.1:121834:121856:-            | 824554           | 49.3  | 2.96   | 16.87    | 1.21      | 16.46   | 9.09     | 0.61     | 0.04      | 0.22           | 0.01            | 0.24          | 0.14           | 0.7     | 0.41     | 1.05          | 0.17           | 0.23         | 0.3           |
| miR-K3-3p  | NC:009333.1:121794:121814:-            | 6823             | 62.79 | 3.65   | 21.4     | 2.93      | 0.22    | 3.15     | 1.22     | 0.06      | 0.41           | 0.22            | 0             | 0              | 3.06    | 0.21     | 0.53          | 0              | 0            | 0.16          |
| miR-K4-5p  | NC:009333.1:121703:121724:-            | 90622            | 60.7  | 1.4    | 24.9     | 0.4       | 0.36    | 7.41     | 0.45     | 0.01      | 0.25           | 0               | 0             | 0.03           | 0.32    | 0.63     | 2.62          | 0.43           | 0            | 0.08          |
| miR-K4-3p  | NC:009333.1:121665:121686:-            | 924147           | 60.89 | 9.57   | 18.43    | 1.85      | 2.25    | 4.53     | 1.39     | 0.16      | 0.31           | 0.03            | 0.11          | 0.13           | 0.01    | 0.24     | 0.01          | 0.1            | 0            | 0.01          |
| miR-K5-5p  | NC:009333.1:121552:121574:-            | 898              | 0     | 2.67   | 16.93    | 0.56      | 0       | 0        | 0        | 0         | 0.22           | 0               | 0             | 0              | 0       | 5.46     | 59.8          | 14.37          | 0            | 0             |
| miR-K5-3p  | NC:009333.1:121513:121535:-            | 99759            | 61.02 | 4.85   | 16.8     | 1.27      | 0.15    | 12.96    | 1.11     | 0.09      | 0.24           | 0.03            | 0             | 0.26           | 0.24    | 0.24     | 0.5           | 0.12           | 0            | 0.13          |
| miR-K6-5p  | NC:009333.1:121044:121065:-            | 32509            | 46.88 | 0.7    | 11.22    | 0.13      | 21.17   | 17.97    | 0.49     | 0.02      | 0.2            | 0               | 0.35          | 0.24           | 0.02    | 0.32     | 0.06          | 0.08           | 0            | 0.14          |
| miR-K6-3p  | NC:009333.1:121012:121033:-            | 550009           | 46.04 | 1.8    | 16.63    | 0.98      | 5.61    | 26.01    | 1.3      | 0.06      | 0.31           | 0.02            | 0.41          | 0.62           | 0.05    | 0.05     | 0.02          | 0.02           | 0.01         | 0.04          |
| miR-K11-5p | NC:009333.1:120864:120887:-            | 68               | 48.53 | 0      | 26.47    | 0         | 1.47    | 23.53    | 0        | 0         | 0              | 0               | 0             | 0              | 0       | 0        | 0             | 0              | 0            | 0             |
| miR-K11-3p | NC:009333.1:120827:120848:-            | 555179           | 51.69 | 5.87   | 20.52    | 1.69      | 11.3    | 7.6      | 0.42     | 0.04      | 0.14           | 0.02            | 0.13          | 0.08           | 0.2     | 0.11     | 0.11          | 0.03           | 0.03         | 0.02          |
| miR-K7-5p  | NC:009333.1:120644:120667:-            | 3980             | 7.59  | 0.63   | 34.8     | 2.46      | 0       | 1.06     | 0.03     | 0         | 0.28           | 0               | 0             | 0              | 0.1     | 0.23     | 44.12         | 8.72           | 0            | 0             |



|                       |                                        |                  |       |        |          |           |         |          |          |           |                |                 |               |                |         |          |               |                |              |               |
|-----------------------|----------------------------------------|------------------|-------|--------|----------|-----------|---------|----------|----------|-----------|----------------|-----------------|---------------|----------------|---------|----------|---------------|----------------|--------------|---------------|
| miR-K7-3p             | NC:009333.1:120608:120627:-            | 491698           | 3.29  | 1.57   | 4.23     | 0.06      | 69.83   | 19.61    | 0.03     | 0.02      | 0.02           | 0               | 0.67          | 0.22           | 0       | 0.01     | 0             | 0.03           | 0.05         | 0.38          |
| miR-K8-5p             | NC:009333.1:120233:120254:-            | 48076            | 47.21 | 2.17   | 23.95    | 3.68      | 15.36   | 6.22     | 0.38     | 0         | 0.19           | 0.06            | 0.19          | 0.06           | 0.16    | 0.09     | 0.08          | 0.05           | 0.08         | 0.06          |
| miR-K8-3p             | NC:009333.1:120194:120214:-            | 259837           | 23.41 | 0.57   | 38.41    | 3.12      | 7.99    | 17.81    | 1.95     | 0.05      | 2.44           | 0.2             | 1.71          | 2.08           | 0.02    | 0.06     | 0.03          | 0.11           | 0            | 0.05          |
| miR-K9-5p             | NC:009333.1:119586:119607:-            | 52427            | 28.79 | 3.91   | 34.29    | 13.28     | 0.07    | 10.19    | 0.17     | 0.01      | 0.18           | 0.04            | 0             | 0.06           | 0.74    | 1.08     | 4.2           | 2.78           | 0            | 0.22          |
| miR-K9-3p             | NC:009333.1:119552:119573:-            | 16388            | 35.15 | 3.69   | 43.18    | 2.96      | 3.47    | 3.52     | 4.63     | 0.35      | 1.47           | 0.05            | 0.7           | 0.16           | 0.02    | 0.23     | 0.11          | 0.31           | 0            | 0.01          |
| miR-K10a-5p           | NC:009333.1:118116:118137:-            | 829              | 76.6  | 2.29   | 10.01    | 0.72      | 6.15    | 2.9      | 0        | 0.6       | 0              | 0               | 0             | 0              | 0       | 0.72     | 0             | 0              | 0            | 0             |
| miR-K10a-3p           | NC:009333.1:118076:118097:-            | 211596           | 15.63 | 8.85   | 28.02    | 9.57      | 0.03    | 4.46     | 0.17     | 0.12      | 0.37           | 0.1             | 0             | 0.04           | 5.55    | 4.87     | 14.1          | 6.34           | 0.01         | 1.76          |
| miR-K12-5p            | NC:009333.1:117835:117857:-            | 15716            | 2.94  | 0.2    | 11.82    | 1.21      | 0.01    | 5.17     | 0.29     | 0         | 0.11           | 0.04            | 0.48          | 1.08           | 0.01    | 0.06     | 61.52         | 14.91          | 0.09         | 0.07          |
| miR-K12-3p            | NC:009333.1:117798:117819:-            | 74075            | 43.92 | 9.08   | 22.91    | 1.61      | 0.38    | 20.29    | 0.41     | 0.09      | 0.16           | 0.03            | 0.2           | 0.1            | 0.19    | 0.15     | 0.23          | 0.13           | 0            | 0.1           |
|                       |                                        |                  |       |        |          |           |         |          |          |           |                |                 |               |                |         |          |               |                |              |               |
| <b>BC-3 (9mm max)</b> |                                        |                  |       |        |          |           |         |          |          |           |                |                 |               |                |         |          |               |                |              |               |
| KSHV miRNA            | GenomicPosition (Ref:Start:End:Strand) | Total read count | fl_id | fl_iso | 3trim_id | 3trim_iso | 3add_id | 3add_iso | 5trim_id | 5trim_iso | 5trim_3trim_id | 5trim_3trim_iso | 5trim_3add_id | 5trim_3add_iso | 5add_id | 5add_iso | 5add3_trim_id | 5add3_trim_iso | 5add3_add_id | 5add3_add_iso |
| miR-K1-5p             | NC:009333.1:122137:122159:-            | 1375274          | 21.02 | 4.64   | 26.69    | 1.46      | 39.42   | 4.25     | 0.36     | 0.09      | 0.53           | 0.02            | 1.2           | 0.11           | 0.01    | 0.04     | 0.01          | 0.06           | 0.02         | 0.09          |
| miR-K1-3p             | NC:009333.1:122100:122121:-            | 715              | 46.85 | 4.34   | 37.62    | 3.64      | 0       | 0.98     | 1.54     | 0         | 3.36           | 0               | 0             | 0              | 0       | 0.42     | 1.12          | 0.14           | 0            | 0             |
| miR-K2-5p             | NC:009333.1:121977:121998:-            | 699439           | 31.44 | 0.81   | 41.6     | 5.13      | 3.21    | 16.28    | 0.34     | 0.01      | 0.39           | 0.05            | 0.15          | 0.24           | 0.03    | 0.1      | 0.04          | 0.14           | 0            | 0.03          |
| miR-K2-3p             | NC:009333.1:121935:121955:-            | 5392             | 19.57 | 1.58   | 5.51     | 0.11      | 4.36    | 57.88    | 2.06     | 0.17      | 0.13           | 0               | 0.2           | 2.1            | 2.34    | 0.15     | 2.76          | 0.24           | 0.02         | 0.83          |
| miR-K3-5p             | NC:009333.1:121834:121856:-            | 6072927          | 49.16 | 1.77   | 9.85     | 0.71      | 22.29   | 11.3     | 0.76     | 0.03      | 0.14           | 0.01            | 0.36          | 0.2            | 0.93    | 0.34     | 0.94          | 0.1            | 0.69         | 0.41          |
| miR-K3-3p             | NC:009333.1:121794:121814:-            | 49666            | 44.9  | 2.11   | 21.46    | 2.25      | 0.09    | 1.7      | 0.88     | 0.09      | 0.54           | 0.09            | 0             | 0.05           | 20.5    | 1.01     | 3.7           | 0.3            | 0.04         | 0.29          |
| miR-K4-5p             | NC:009333.1:121703:121724:-            | 612461           | 70.4  | 1.36   | 17.26    | 0.24      | 0.41    | 6.3      | 0.47     | 0.02      | 0.22           | 0.01            | 0             | 0.04           | 0.46    | 0.64     | 1.86          | 0.27           | 0            | 0.04          |
| miR-K4-3p             | NC:009333.1:121665:121686:-            | 5693876          | 69.94 | 4.78   | 15.84    | 1.04      | 2.08    | 3.92     | 1.47     | 0.09      | 0.29           | 0.01            | 0.06          | 0.08           | 0.02    | 0.27     | 0.01          | 0.08           | 0            | 0.01          |
| miR-K5-5p             | NC:009333.1:121552:121574:-            | 3865             | 0.54  | 2.61   | 35.76    | 1.03      | 0       | 0.05     | 0        | 0.08      | 0.78           | 0.03            | 0             | 0              | 0.54    | 3.44     | 48.41         | 6.6            | 0            | 0.13          |
| miR-K5-3p             | NC:009333.1:121513:121535:-            | 264889           | 67.36 | 5.52   | 10.36    | 0.75      | 0.11    | 12.82    | 1.44     | 0.12      | 0.2            | 0               | 0             | 0.27           | 0.33    | 0.26     | 0.28          | 0.08           | 0            | 0.08          |
| miR-K6-5p             | NC:009333.1:121044:121065:-            | 118992           | 37.84 | 0.58   | 9.83     | 0.15      | 31.03   | 16.95    | 0.62     | 0.03      | 0.16           | 0               | 1.72          | 0.51           | 0.03    | 0.18     | 0.01          | 0.06           | 0.05         | 0.25          |
| miR-K6-3p             | NC:009333.1:121012:121033:-            | 1783080          | 51.86 | 1.42   | 12       | 1.07      | 6       | 24.93    | 1.19     | 0.05      | 0.2            | 0.02            | 0.41          | 0.64           | 0.06    | 0.07     | 0.02          | 0.02           | 0.01         | 0.04          |

|                    |                             |         |       |      |       |       |       |       |      |      |      |      |      |      |      |      |       |       |      |      |
|--------------------|-----------------------------|---------|-------|------|-------|-------|-------|-------|------|------|------|------|------|------|------|------|-------|-------|------|------|
| <b>miR-K11-5p</b>  | NC:009333.1:120864:120887:- | 7602    | 49.7  | 0.97 | 38.04 | 0.79  | 2.18  | 6.95  | 0.3  | 0.01 | 0.34 | 0.01 | 0    | 0.12 | 0    | 0.3  | 0.18  | 0     | 0.08 | 0.01 |
| <b>miR-K11-3p</b>  | NC:009333.1:120827:120848:- | 2792234 | 63.19 | 3.81 | 16.79 | 1.24  | 7.84  | 5.7   | 0.53 | 0.03 | 0.11 | 0.01 | 0.13 | 0.06 | 0.29 | 0.1  | 0.09  | 0.02  | 0.03 | 0.03 |
| <b>miR-K7-5p</b>   | NC:009333.1:120644:120667:- | 77410   | 17    | 1.5  | 57.41 | 1.86  | 0.06  | 1.56  | 0.32 | 0.02 | 0.56 | 0.03 | 0    | 0.05 | 0.01 | 0.04 | 16.77 | 2.81  | 0    | 0    |
| <b>miR-K7-3p</b>   | NC:009333.1:120608:120627:- | 2658959 | 2.23  | 1.21 | 2.7   | 0.03  | 74.59 | 17.73 | 0.02 | 0.01 | 0.01 | 0    | 0.8  | 0.2  | 0    | 0.01 | 0     | 0.01  | 0.06 | 0.38 |
| <b>miR-K8-5p</b>   | NC:009333.1:120233:120254:- | 272236  | 64.02 | 1.96 | 14.85 | 2.11  | 10.53 | 5.05  | 0.51 | 0.01 | 0.16 | 0.02 | 0.08 | 0.04 | 0.29 | 0.15 | 0.06  | 0.03  | 0.06 | 0.05 |
| <b>miR-K8-3p</b>   | NC:009333.1:120194:120214:- | 1189987 | 31.12 | 0.57 | 22.86 | 2.05  | 11.88 | 21.68 | 2.85 | 0.05 | 1.7  | 0.14 | 2.37 | 2.5  | 0.02 | 0.07 | 0.03  | 0.06  | 0.01 | 0.05 |
| <b>miR-K9-5p</b>   | NC:009333.1:119586:119607:- | 82      | 30.49 | 2.44 | 36.59 | 14.63 | 0     | 13.41 | 0    | 0    | 0    | 0    | 0    | 0    | 0    | 0    | 1.22  | 1.22  | 0    | 0    |
| <b>miR-K9-3p</b>   | NC:009333.1:119552:119573:- | 41      | 31.71 | 2.44 | 46.34 | 0     | 4.88  | 0     | 0    | 7.32 | 0    | 7.32 | 0    | 0    | 0    | 0    | 0     | 0     | 0    | 0    |
| <b>miR-K10a-5p</b> | NC:009333.1:118116:118137:- | 18926   | 69.38 | 2.16 | 15.33 | 0.82  | 9.35  | 1.72  | 0.69 | 0.01 | 0.04 | 0.02 | 0.15 | 0.02 | 0.04 | 0.17 | 0.01  | 0.05  | 0.03 | 0.03 |
| <b>miR-K10a-3p</b> | NC:009333.1:118076:118097:- | 1263749 | 22.32 | 6.24 | 22.52 | 5.84  | 0.03  | 4.76  | 0.33 | 0.08 | 0.33 | 0.08 | 0    | 0.08 | 9.74 | 5.73 | 12.99 | 6.55  | 0.03 | 2.34 |
| <b>miR-K12-5p</b>  | NC:009333.1:117835:117857:- | 143843  | 2.22  | 0.59 | 9.14  | 3.38  | 0.01  | 3.38  | 0.19 | 0.02 | 0.22 | 0.1  | 0.27 | 0.47 | 0.04 | 0.04 | 62.97 | 16.93 | 0    | 0.03 |
| <b>miR-K12-3p</b>  | NC:009333.1:117798:117819:- | 1237340 | 50.92 | 7.96 | 20.4  | 1.67  | 0.44  | 15.6  | 0.38 | 0.08 | 0.19 | 0.01 | 0.8  | 0.38 | 0.31 | 0.29 | 0.32  | 0.16  | 0    | 0.09 |

## SUPPLEMENTARY FIGURE LEGENDS

**Figure S1. (A) Cluster of KSHV miRNAs.** The twelve KSHV pre-miRNAs are localized in the latency locus and are indicated by red arrows. Ten of them are clustered in an intron (pre-miR-K1 to -K9 and pre-miR-K11) whereas pre-miR-K10 and -K12 are in the coding region and in the 3'UTR of Kaposin mRNA, respectively. Genomic coordinates of the intronic cluster of pre-miRNAs are 122209 to 119153.

**(B) Positions of the RT primers used for SHAPE analysis.** KSHV pri-miR-K10/12 is schematized with the 10 pre-miRNAs in black boxes. Letters (B to N) correspond to the 5' position of the oligonucleotides used for reverse transcription (see Table S1).

**Figure S2. Pie chart representations of the different small RNA categories found in the libraries.** Values were derived from Table S2.

**Figure S3. Alignments of genomic DNA from KSHV cluster from various cell lines compared to the sequence in RefSeq.**

The genomic sequences of the three cell lines used in this study (DG-75-K10/12, BCBL-1 and BC-3) were compared to the reference sequence (NC\_009333.1). An asterisk indicates sequence variations, and point mutations or deletions are indicated in red. The 5p and 3p arms of the pre-miRNAs are indicated, with the most abundant forms in dark grey and the less abundant in light grey. Genomic positions are indicated.

**Figure S4. KSHV miRNA offset RNA (A) and antisense miRNA (B) detection by northern blot analysis.**

40  $\mu$ g of total RNA from DG-75-K10/12, BCBL-1 and BC-3 cell lines were loaded on a 15% PAGE and submitted to northern blot analysis. Total RNA from DG-75-EGFP, expressing no KSHV RNAs, was used as a negative control. Bands corresponding to moRs and AS-miRNAs are indicated by an asterisk. U6 RNA was probed as a loading control. A ladder is indicated next to the autoradiograms.

**Figure S5. Secondary structure of KSHV miRNA stem-loops.**

MiRNA stem-loops composed of the pre-miRNA plus ~20 nucleotides before and after the Drosha cleavage site are represented. SHAPE reactivity of each nucleotide is indicated. Arrows correspond to cleavage by RNase T1 (after single stranded G residues). Asterisks

indicate the UG motif at -14 and -13 from the 5' of the cleavage site. The most abundant sequences of the miRNA-5p and -3p and the different isoforms are indicated in black and in grey respectively, along with the number of reads obtained by deep sequencing. Non-template nucleotides found at the ends of the miRNA are shown. For some pre-miRNAs, microRNA offset RNAs (moRs) were sequenced and are indicated in grey. They are localized upstream of the miRNA-5p and present variations at their 5' end (as indicated by short lines in grey) whereas the 3' extremity is invariant.

**Figure S6. Additional mutants of sub-optimal miRNA stem-loops.**

miR-K2 (A) and miR-K5 (B) were mutated to optimize their secondary structure. The resulting mutants were cloned in the pcDNA-K10/12 expression plasmid. The resulting constructs were then transfected in HEK293Grip cells and total RNA was analyzed by northern blot for the studied miRNA. miR-16 was probed as a loading control. Inserted nucleotides derived from the miR-K6 stem-loop are indicated in blue, red crosses indicate deletions.

**Figure S1**

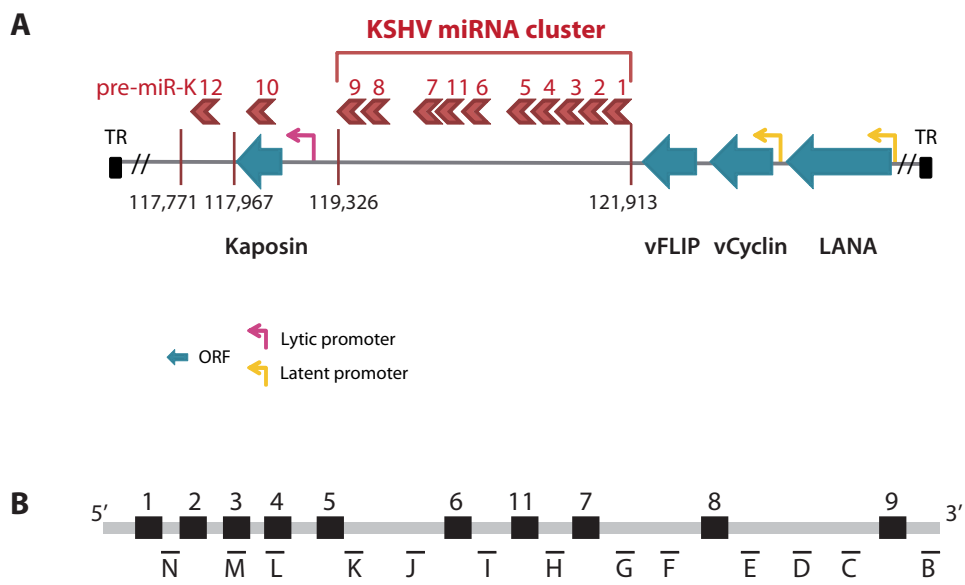

Figure S2

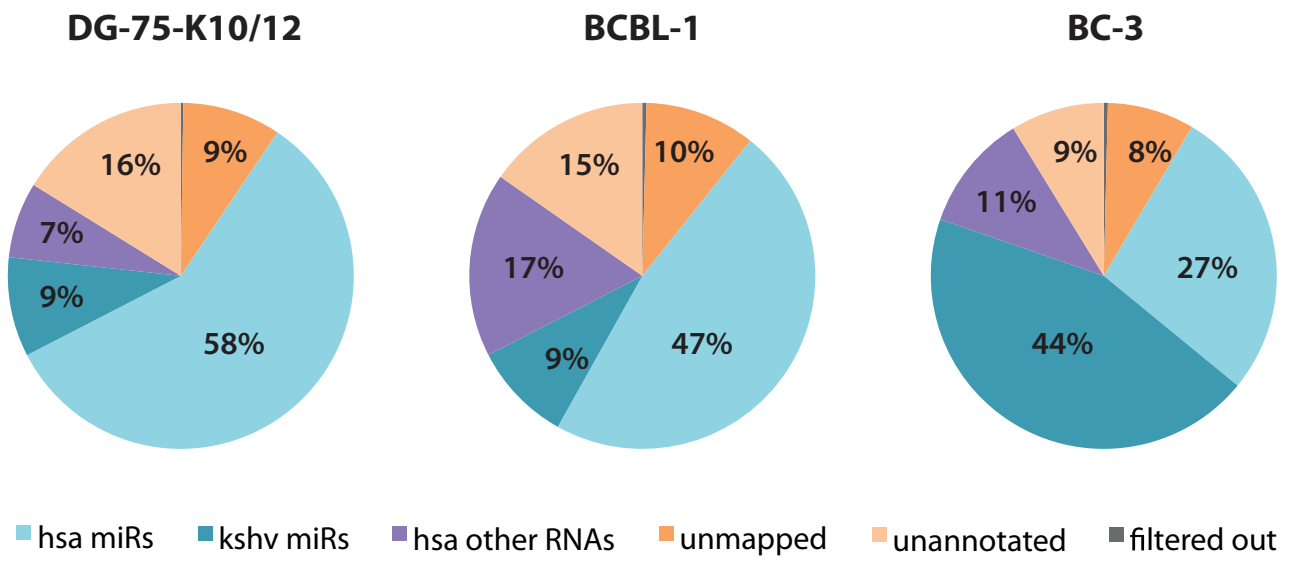

Figure S3

|                                               | 10     | 20                                                            | 30                           | 40                 | 50         |            |
|-----------------------------------------------|--------|---------------------------------------------------------------|------------------------------|--------------------|------------|------------|
| NC_009333.1<br>DG-75-K10/12<br>BCBL-1<br>BC-3 | 122282 | TAAAAACAGGAAGCGGGTTGGACTGGCAGGGTGGGAGGAAGGATGTGGGGGTGGGGGGACG |                              |                    |            | 122223     |
|                                               |        | TAAAAACAGGAAG-GGGTTGGAA                                       | TGGCAGGGTGGGAGGAAGGATGTGGGGG | C                  | GGGGGGGACG |            |
|                                               |        | TAAAAACAGGAAGCGGGTTGGACTGGCAGGGTGGGAGGAAGGATGTGGGGG           |                              |                    | C          | GGGGGGGACG |
|                                               |        | TAAAAACAGGAAGCGGGTTGGACTGGCAGGGTGGGAGGAAGGATGTGGGGG           |                              |                    | *          | GGGGGGGACG |
|                                               | 122222 | AGGAAAAAGTACGCGGTTGTTTACGCAGGGTGC                             | CGGTGCTGCC                   | CAGGACGGCCGGATGCGG |            | 122163     |
|                                               |        | AGGAAAAAGTACGCGGTTGTTTACGCAGGGTGC                             | CGGTGCTGCC                   | CAGGACGGCCGGATGCGG |            |            |
|                                               |        | AGGAAAAAGTACGCGGTTGTTTACGCAGGGTGC                             | CGGTGCTGCC                   | CAGGACGGCCGGATGCGG |            |            |
|                                               |        | AGGAAAAAGTACGCGGTTGTTTACGCAGGGTGC                             | CGGTGCTGCC                   | CAGGACGGCCGGATGCGG |            |            |
|                                               |        | <b>miR-K1-5p</b>                                              |                              | <b>miR-K1-3p</b>   |            |            |
|                                               | 122162 | GCGATTACAGGAAACTGGGTGTAAGCTGTACATAATCCCCGGCAGCACCTGTTTCCCTGCA |                              |                    |            | 122103     |
|                                               |        | GCGATTACAGGAAACTGGGTGTAAGCTGTACATAATCCCCGGCAGCACCTGTTTCCCTGCA |                              |                    |            |            |
|                                               |        | GCGATTACAGGAAACTGGGTGTAAGCTGTACATAATCCCCGGCAGCACCTGTTTCCCTGCA |                              |                    |            |            |
|                                               |        | GCGATTACAGGAAACTGGGTGTAAGCTGTACATAATCCCCGGCAGCACCTGTTTCCCTGCA |                              |                    |            |            |
|                                               | 122102 | ACCCTCGTGTGTTGGGCAAAACACATCCGCTGCCACCTGCGTGTTC                | CCGGCGCGAAAGTCC              |                    |            | 122043     |
|                                               |        | ACCCTCGTGTGTTGGGCAAAACACATCCGCTGCCACCTGCGTGTTC                | CCGGCGCGAAAGTCC              |                    |            |            |
|                                               |        | ACCCTCGTGTGTTGGGCAAAACACATCCGCTGCCACCTGCGTGTTC                | CCGGCGCGAAAGTCC              |                    |            |            |
|                                               |        | ACCCTCGTGTGTTGGGCAAAACACATCCGCTGCCACCTGCGTGTTC                | CCGGCGCGAAAGTCC              |                    |            |            |
|                                               |        | <b>miR-K2-5p</b>                                              |                              | <b>miR-K2-3p</b>   |            |            |
|                                               | 122042 | GTCAACCAGATTTAAGATTAAGATTATAATGGGTCTACTTCGCTA                 | ACTGTAGTCCGGGTC              |                    |            | 121983     |
|                                               |        | GTCAACCAGATTTAAGATTAAGATTATAATGGGTCTACTTCGCTA                 | ACTGTAGTCCGGGTC              |                    |            |            |
|                                               |        | GTCAACCAGATTTAAGATTAAGATTATAATGGGTCTACTTCGCTA                 | ACTGTAGTCCGGGTC              |                    |            |            |
|                                               |        | GTCAACCAGATTTAAGATTAAGATTATAATGGGTCTACTTCGCTA                 | ACTGTAGTCCGGGTC              |                    |            |            |
|                                               |        | <b>miR-K2-3p</b>                                              |                              | <b>miR-K2-5p</b>   |            |            |
|                                               | 121982 | GATCTGAGCCATTGAAGCAAGCTTCCAGATCTTCCAGGGCTAGAGCTGCCGCGGTGACAC  |                              |                    |            | 121923     |
|                                               |        | GATCTGAGCCATTGAAGCAAGCTTCCAGATCTTCCAGGGCTAGAGCTGCCGCGGTGACAC  |                              |                    |            |            |
|                                               |        | GATCTGAGCCATTGAAGCAAGCTTCCAGATCTTCCAGGGCTAGAGCTGCCGCGGTGACAC  |                              |                    |            |            |
|                                               |        | GATCTGAGCCATTGAAGCAAGCTTCCAGATCTTCCAGGGCTAGAGCTGCCGCGGTGACAC  |                              |                    |            |            |
|                                               | 121922 | CAATTATAGAAAATTTGGTCCCCAAACTCCCAACCAACGCAACAGCTACAATGCCTGTAAT |                              |                    |            | 121803     |
|                                               |        | CAATTATAGAAAATTTGGTCCCCAAACTCCCAACCAACGCAACAGCTACAATGCCTGTAAT |                              |                    |            |            |
|                                               |        | CAATTATAGAAAATTTGGTCCCCAAACTCCCAACCAACGCAACAGCTACAATGCCTGTAAT |                              |                    |            |            |
|                                               |        | CAATTATAGAAAATTTGGTCCCCAAACTCCCAACCAACGCAACAGCTACAATGCCTGTAAT |                              |                    |            |            |
|                                               |        | <b>miR-K3-5p</b>                                              |                              | <b>miR-K3-3p</b>   |            |            |
|                                               | 121862 | GGGCTATCACATTCTGAGGACGGCAGCGACGTGTGTCTAACGTCAACGT             | CGCGGTACACAG                 |                    |            | 121743     |
|                                               |        | GGGCTATCACATTCTGAGGACGGCAGCGACGTGTGTCTAACGTCAACGT             | CGCGGTACACAG                 |                    |            |            |
|                                               |        | GGGCTATCACATTCTGAGGACGGCAGCGACGTGTGTCTAACGTCAACGT             | CGCGGTACACAG                 |                    |            |            |
|                                               |        | GGGCTATCACATTCTGAGGACGGCAGCGACGTGTGTCTAACGTCAACGT             | CGCGGTACACAG                 |                    |            |            |
|                                               | 121802 | AATGTGACACCCCTCCAGGTCCAAGCGACGAACCGCCCGTGGCCACAACGCCGCTGGTG   |                              |                    |            | 121683     |
|                                               |        | AATGTGACACCCCTCCAGGTCCAAGCGACGAACCGCCCGTGGCCACAACGCCGCTGGTG   |                              |                    |            |            |
|                                               |        | AATGTGACACCCCTCCAGGTCCAAGCGACGAACCGCCCGTGGCCACAACGCCGCTGGTG   |                              |                    |            |            |
|                                               |        | AATGTGACACCCCTCCAGGTCCAAGCGACGAACCGCCCGTGGCCACAACGCCGCTGGTG   |                              |                    |            |            |
|                                               |        | <b>miR-K4-5p</b>                                              |                              | <b>miR-K4-3p</b>   |            |            |
|                                               | 121742 | GAACCGGGCAGTATAACTAGCTAAACCGCAGTACTCTAGGGCATTTCATTTGTTACATAGA |                              |                    |            | 121623     |
|                                               |        | GAACCGGGCAGTATAACTAGCTAAACCGCAGTACTCTAGGGCATTTCATTTGTTACATAGA |                              |                    |            |            |
|                                               |        | GAACCGGGCAGTATAACTAGCTAAACCGCAGTACTCTAGGGCATTTCATTTGTTACATAGA |                              |                    |            |            |
|                                               |        | GAACCGGGCAGTATAACTAGCTAAACCGCAGTACTCTAGGGCATTTCATTTGTTACATAGA |                              |                    |            |            |
|                                               |        | <b>miR-K4-3p</b>                                              |                              | <b>miR-K5-5p</b>   |            |            |
|                                               | 121682 | ATACTGAGGCCTAGCTGATTATACTACCTCCGTCCAGCAGTCGACACGGATGTCTACGCC  |                              |                    |            | 121563     |
|                                               |        | ATACTGAGGCCTAGCTGATTATACTACCTCCGTCCAGCAGTCGACACGGATGTCTACGCC  |                              |                    |            |            |
|                                               |        | ATACTGAGGCCTAGCTGATTATACTACCTCCGTCCAGCAGTCGACACGGATGTCTACGCC  |                              |                    |            |            |
|                                               |        | ATACTGAGGCCTAGCTGATTATACTACCTCCGTCCAGCAGTCGACACGGATGTCTACGCC  |                              |                    |            |            |
|                                               | 121622 | TCTCAAACCTCGTGGGCACGGCGTCATGACTAAGGGGGAGTTTGACCTAGGTAGTCCCTA  |                              |                    |            |            |
|                                               |        | TCTCAAACCTCGTGGGCACGGCGTCATGACTAAGGGGGAGTTTGACCTAGGTAGTCCCTA  |                              |                    |            |            |
|                                               |        | TCTCAAACCTCGTGGGCACGGCGTCATGACTAAGGGGGAGTTTGACCTAGGTAGTCCCTA  |                              |                    |            |            |
|                                               |        | TCTCAAACCTCGTGGGCACGGCGTCATGACTAAGGGGGAGTTTGACCTAGGTAGTCCCTA  |                              |                    |            |            |

|              | 10     | 20                                                             | 30                           | 40                | 50                |        |
|--------------|--------|----------------------------------------------------------------|------------------------------|-------------------|-------------------|--------|
| NC_009333.1  | 121562 | <b>miR-K5-5p</b>                                               |                              | <b>miR-K5-3p</b>  |                   | 121503 |
| DG-75-K10/12 |        | GTGCCCTAAGGGTCTACATCAAGCACTTAGGATGCC                           | TGGAAC                       | TGCGCGGT          | CAAGCCC           | CGCT   |
| BCBL-1       |        | GTGCCCTAAGGGTCTACATCAAGCACTTAGGATGCC                           | TGGAAC                       | TGCGCGGT          | CAAGCCC           | CGCT   |
| BC-3         |        | GTGCCCTAAGGGTCTACATCAAGCACTTAGGATGCC                           | TGGAAC                       | TGCGCGGT          | CAAGCCC           | CGCT   |
|              | 121502 | CATAAGACCATAACCTGGTGCCACAAAAACCTATGCGGGTCCAGCAAATGCTACCTTGGC   |                              |                   |                   | 121443 |
|              |        | CATAAGACCATAACCTGGTGCCACAAAAACCTATGCGGGTCCAGCAAATGCTACCTTGGC   |                              |                   |                   |        |
|              |        | CATAAGACCATAACCTGGTGCCACAAAAACCTATGCGGGTCCAGCAAATGCTACCTTGGC   |                              |                   |                   |        |
|              |        | CATAAGACCATAACCTGGTGCCACAAAAACCTATGCGGGTCCAGCAAATGCTACCTTGGC   |                              |                   |                   |        |
|              | 121442 | AACACGTAAAAGATTTGGTCCCTGAAAGGGTCCGAAAACCACAACGTTATTTAGAACCAC   |                              |                   |                   | 121383 |
|              |        | AACACGTAAAAGATTTGGTCCCTGAAAGGGTCCGAAAACCACAACGTTATTTAGAACCAC   |                              |                   |                   |        |
|              |        | AACACGTAAAAGATTTGGTCCCTGAAAGGGTCCGAAAACCACAACGTTATTTAGAACCAC   |                              |                   |                   |        |
|              |        | AACACGTAAAAGATTTGGTCCCTGAAAGGGTCCGAAAACCACAACGTTATTTAGAACCAC   |                              |                   |                   |        |
|              | 121382 | GGCAATCTCACAAAAGGGGGTCCGTAGATGTAAATACAGCAAATAACAGGGTAAAAAAA    |                              |                   |                   | 121323 |
|              |        | GGCAATCTCACAAAAGGGGGTCCGTAGATGTAAATACAGCAAATAACAGGGTAAAAAAA    |                              |                   |                   |        |
|              |        | GGCAATCTCACAAAAGGGGGTCCGTAGATGTAAATACAGCAAATAACAGGGTAAAAAAA    |                              |                   |                   |        |
|              |        | GGCAATCTCACAAAAGGGGGTCCGTAGATGTAAATACAGCAAATAACAGGGTAAAAAAA    |                              |                   |                   |        |
|              | 121322 | TGAGTGGGCGGGGGCGGCAGTTTTACTTACTAAATCAGGGTAAACCCATAGTGACGGGGG   |                              |                   |                   | 121263 |
|              |        | TGAGTGGGCGGGGGCGGCAGTTTTACTTACTAAATCAGGGTAAACCCATAGTGACGGGGG   |                              |                   |                   |        |
|              |        | TGAGTGGGCGGGGGCGGCAGTTTTACTTACTAAATCAGGGTAAACCCATAGTGACGGGGG   |                              |                   |                   |        |
|              |        | TGAGTGGGCGGGGGCGGCAGTTTTACTTACTAAATCAGGGTAAACCCATAGTGACGGGGG   |                              |                   |                   |        |
|              | 121262 | GAGGGTGCCTCACTAATTTGACACCATGCGGGAAACGCCAAACGGGCGATGGAAACTTGT   |                              |                   |                   | 121203 |
|              |        | GAGGGTGCCTCACTAATTTGACACCATGCGGGAAACGCCAAACGGGCGATGGAAACTTGT   |                              |                   |                   |        |
|              |        | GAGGGTGCCTCACTAATTTGACACCATGCGGGAAACGCCAAACGGGCGATGGAAACTTGT   |                              |                   |                   |        |
|              |        | GAGGGTGCCTCACTAATTTGACACCATGCGGGAAACGCCAAACGGGCGATGGAAACTTGT   |                              |                   |                   |        |
|              | 121202 | CAACACTCCAAAAAATAGAAGGTTGGGTAAC                                | TGCGGGCTGGTGTCAACTTCTGTTAATT |                   |                   | 121143 |
|              |        | CAACACTCCAAAAAATAGAAGGTTGGGTAAC                                | TGCGGGCTGGTGTCAACTTCTGTTAATT |                   |                   |        |
|              |        | CAACACTCCAAAAAATAGAAGGTTGGGTAAC                                | TGCGGGCTGGTGTCAACTTCTGTTAATT |                   |                   |        |
|              |        | CAACACTCCAAAAAATAGAAGGTTGGGTAAC                                | TGCGGGCTGGTGTCAACTTCTGTTAATT |                   |                   |        |
|              | 121242 | ATGAATAGTGTTTTTTAAAGCGGGCGTTCGTAAGCGTCTGGATCGACACAAACCC        | TGCGCG                       |                   |                   | 121083 |
|              |        | ATGAATAGTGTTTTTTAAAGCGGGCGTTCGTAAGCGTCTGGATCGACACAAACCC        | TGCGCG                       |                   |                   |        |
|              |        | ATGAATAGTGTTTTTTAAAGCGGGCGTTCGTAAGCGTCTGGATCGACACAAACCC        | TGCGCG                       |                   |                   |        |
|              |        | ATGAATAGTGTTTTTTAAAGCGGGCGTTCGTAAGCGTCTGGATCGACACAAACCC        | TGCGCG                       |                   |                   |        |
|              | 121082 | GGTTTAGAAAAGACTTGTCCAGCAGCACCTAATCCATCGGCGGTGCGGGCTGATGGTTTTTC |                              | <b>miR-K6-5p</b>  | <b>miR-K6-3p</b>  | 121023 |
|              |        | GGTTTAGAAAAGACTTGTCCAGCAGCACCTAATCCATCGGCGGTGCGGGCTGATGGTTTTTC |                              |                   |                   |        |
|              |        | GGTTTAGAAAAGACTTGTCCAGCAGCACCTAATCCATCGGCGGTGCGGGCTGATGGTTTTTC |                              |                   |                   |        |
|              |        | GGTTTAGAAAAGACTTGTCCAGCAGCACCTAATCCATCGGCGGTGCGGGCTGATGGTTTTTC |                              |                   |                   |        |
|              | 121022 | GGGCTGTTGAGCGAGTCTTTTTATCTAGTCGCCCGTTATTGTTCTGTGTGTTCTTCATCA   |                              |                   |                   | 120963 |
|              |        | GGGCTGTTGAGCGAGTCTTTTTATCTAGTCGCCCGTTATTGTTCTGTGTGTTCTTCATCA   |                              |                   |                   |        |
|              |        | GGGCTGTTGAGCGAGTCTTTTTATCTAGTCGCCCGTTATTGTTCTGTGTGTTCTTCATCA   |                              |                   |                   |        |
|              |        | GGGCTGTTGAGCGAGTCTTTTTATCTAGTCGCCCGTTATTGTTCTGTGTGTTCTTCATCA   |                              |                   |                   |        |
|              | 120962 | TTTCACCCACCGTCTCTCAATAGCCTTGGGAATCCTACCTCCACGCTCGCGTATGCCTCA   |                              |                   |                   | 120903 |
|              |        | TTTCACCCACCGTCTCTCAATAGCCTTGGGAATCCTACCTCCACGCTCGCGTATGCCTCA   |                              |                   |                   |        |
|              |        | TTTCACCCACCGTCTCTCAATAGCCTTGGGAATCCTACCTCCACGCTCGCGTATGCCTCA   |                              |                   |                   |        |
|              |        | TTTCACCCACCGTCTCTCAATAGCCTTGGGAATCCTACCTCCACGCTCGCGTATGCCTCA   |                              |                   |                   |        |
|              | 120902 | TGCGAGGTTTCGCTTTGGTCAACAGCTTAAACATTTCTAGGGCGGTGTTATGATCCTTAATG |                              | <b>miR-K11-5p</b> | <b>miR-K11-3p</b> | 120843 |
|              |        | TGCGAGGTTTCGCTTTGGTCAACAGCTTAAACATTTCTAGGGCGGTGTTATGATCCTTAATG |                              |                   |                   |        |
|              |        | TGCGAGGTTTCGCTTTGGTCAACAGCTTAAACATTTCTAGGGCGGTGTTATGATCCTTAATG |                              |                   |                   |        |
|              |        | TGCGAGGTTTCGCTTTGGTCAACAGCTTAAACATTTCTAGGGCGGTGTTATGATCCTTAATG |                              |                   |                   |        |



10 20 30 40 50

**miR-K11-3p**

NC\_009333.1 120842 CTTAGCCTGTGTCCGATGCGGCCCCCGTGCCCTTGCGGAAGCGCGGGCGGGTTCCCGACCTT 120783  
DG-75-K10/12 CTTAGCCTGTGTCCGATGCGGCCCCCGTGCCCTTGCGGAAGCGCGGGCGGGTTCCCGACCTT  
BCBL-1 CTTAGCCTGTGTCCGATGCGGCCCCCGTGCCCTTGCGGAAGCGCGGGCGGGTTCCCGACCTT  
BC-3 CTTAGCCTGTGTCCGATGCGGCCCCCGTGCCCTTGCGGAAGCGCGGGCGGGTTCCCGACCTT

120782 CACGGCGGCAATTTTTGTGTCGTATGCGCCTCCCTTCGCCTACAAGTCCAATACCCATGAGA 120723  
CACGGCGGCAATTTTTGTGTCGTATGCGCCTCCCTTCGCCTACAAGTCCAATACCCATGAGA  
CACGGCGGCAATTTTTGTGTCGTATGCGCCTCCCTTCGCCTACAAGTCCAATACCCATGAGA  
CACGGCGGCAATTTTTGTGTCGTATGCGCCTCCCTTCGCCTACAAGTCCAATACCCATGAGA

120722 CCACCGTACGCGTGCCACCGATGAGATACCACGCAGCCGCGCATATTGGCGTTGAGCGC 120663  
CCACCGTACGCGTGCCACCGATGAGATACCACGCAGCCGCGCATATTGGCGTTGAGCGC  
CCACCGTACGCGTGCCACCGATGAGATACCACGCAGCCGCGCATATTGGCGTTGAGCGC  
CCACCGTACGCGTGCCACCGATGAGATACCACGCAGCCGCGCATATTGGCGTTGAGCGC

**miR-K7-5p**

**miR-K7-3p**

120662 CACCGGACGGGGATTTATGCTGTATCTTACTACCATGATCCCATGTTGCTGGCGCTCAGC 120603  
CACCGGACGGGGATTTATGCTGTATCTTACTACCATGATCCCATGTTGCTGGCGCTCAGC  
CACCGGACGGGGATTTATGCTGTATCTTACTACCATGATCCCATGTTGCTGGCGCTCAGC  
CACCGGACGGGGATTTATGCTGTATCTTACTACCATGATCCCATGTTGCTGGCGCTCAGC

120602 GCCCGTGTGCCAGCCGCCCTGGACGTCGAAAGCACGCAAAGCTGAACGTTCCGGGCTTAGTG 120543  
GCCCGTGTGCCAGCCGCCCTGGACGTCGAAAGCACGCAAAGCTGAACGTTCCGGGCTTAGTG  
GCCCGTGTGCCAGCCGCCCTGGACGTCGAAAGCACGCAAAGCTGAACGTTCCGGGCTTAGTG  
GCCCGTGTGCCAGCCGCCCTGGACGTCGAAAGCACGCAAAGCTGAACGTTCCGGGCTTAGTG

120542 TAGCGCGAACCATAACGACCTTGGTCCCCGGCCAAAGAGGGGCGCAAACAATTGTGGGT 120483  
TAGCGCGAACCATAACGACCTTGGTCCCCGGCCAAAGAGGGGCGCAAACAATTGTGGGT  
TAGCGCGAACCATAACGACCTTGGTCCCCGGCCAAAGAGGGGCGCAAACAATTGTGGGT  
TAGCGCGAACCATAACGACCTTGGTCCCCGGCCAAAGAGGGGCGCAAACAATTGTGGGT

120482 GGCTATCCTGCCAGAGTCCCATATATTTCTGGTGGGTAGCTAACCTGCCAGGACGTCCA 120423  
GGCTATCCTGCCAGAGTCCCATATATTTCTGGTGGGTAGCTAACCTGCCAGGACGTCCA  
GGCTATCCTGCCAGAGTCCCATATATTTCTGGTGGGTAGCTAACCTGCCAGGACGTCCA  
GGCTATCCTGCCAGAGTCCCATATATTTCTGGTGGGTAGCTAACCTGCCAGGACGTCCA

120422 AATATGCCAAATGGTACCTTAGTGTCTACTTTGCATATTTGGAACCCGTGTATCCATGTA 120363  
AATATGCCAAATGGTACCTTAGTGTCTACTTTGCATATTTGGAACCCGTGTATCCATGTA  
AATATGCCAAATGGTACCTTAGTGTCTACTTTGCATATTTGGAACCCGTGTATCCATGTA  
AATATGCCAAATGGTACCTTAGTGTCTACTTTGCATATTTGGAACCCGTGTATCCATGTA

120362 TGGTTATCGTGCCAGGGTGCCCAAATTCGCTCAATAATGAAAATTCATTCTAGCGCTGG 120303  
TGGTTATCGTGCCAGGGTGCCCAAATTCGCTCAATAATGAAAATTCATTCTAGCGCTGG  
TGGTTATCGTGCCAGGGTGCCCAAATTCGCTCAATAATGAAAATTCATTCTAGCGCTGG  
TGGTTATCGTGCCAGGGTGCCCAAATTCGCTCAATAATGAAAATTCATTCTAGCGCTGG

**miR-K8-5p**

120302 GGTGACAAAGCATGCACCTGGAAATCGGCCAAGTCAGCGCAGCGCGCGCACTCCCTCACTA 120243  
GGTGACAAAGCATGCACCTGGAAATCGGCCAAGTCAGCGCAGCGCGCGCACTCCCTCACTA  
GGTGACAAAGCATGCACCTGGAAATCGGCCAAGTCAGCGCAGCGCGCGCACTCCCTCACTA  
GGTGACAAAGCATGCACCTGGAAATCGGCCAAGTCAGCGCAGCGCGCGCACTCCCTCACTA

**miR-K8-3p**

120242 ACGCCCCGCTTTTGTCTGTTGGAAGCAGCTAGGCGCGACTGAGAGAGCACGCGCGCGGCG 120183  
ACGCCCCGCTTTTGTCTGTTGGAAGCAGCTAGGCGCGACTGAGAGAGCACGCGCGCGGCG  
ACGCCCCGCTTTTGTCTGTTGGAAGCAGCTAGGCGCGACTGAGAGAGCACGCGCGCGGCG  
ACGCCCCGCTTTTGTCTGTTGGAAGCAGCTAGGCGCGACTGAGAGAGCACGCGCGCGGCG

120182 CCCACGCCGGCGCCTGGCACGCGGCCAACATAAAGTGTGGATGGCCCTGCTATCTGACTA 120123  
CGCACGCCGGCGCCTGGCACGCGGCCAACATAAAGTGTGGATGGCCCTGCTATCTGACTA  
CCCACGCCGGCGCCTGGCACGCGGCCAACATAAAGTGTGGATGGCCCTGCTATCTGACTA  
CCCACGCCGGCGCCTGGCACGCGGCCAACATAAAGTGTGGATGGCCCTGCTATCTGACTA  
\*

NC\_009333.1 120122 ATTTGCATGCGCTAATCCTTTTATGTGCATAAAATTATGTAGATGAGGAGTCGCGCATGCC 120063  
DG-75-K10/12 ATTTGCATGCGCTAATCCTTTTATGTGCATAAAATTATGTAGATGAGGAGTCGCGCATGCC  
BCBL-1 ATTTGCATGCGCTAATCCTTTTATGTGCATAAAATTATGTAGATGAGGAGTCGCGCATGCC  
BC-3 ATTTGCATGCGCTAATCCTTTTATGTGCATAAAATTATGTAGATGAGGAGTCGCGCATGCC

120062 CAGAAAAATTCAGAGCGCCGGGTGCACGGGGTCACCTCCAGGTCACGCCGCTAGGTGGGA 120003  
CAGAAAAATTCAGAGCGCCGGGTGCACGGGGTCACCTCCAGGTCACGCCGCTAGGTGGGA  
CAGAAAAATTCAGAGCGCCGGGTGCACGGGGTCACCTCCAGGTCACGCCGCTAGGTGGGA  
CAGAAAAATTCAGAGCGCCGGGTGCACGGGGTCACCTCCAGGTCACGCCGCTAGGTGGG

120002 CCGTGAGCGACTCGAAAAATTATAATTTTGGCCATTTTATGGGCGCCGCCATCTTGAAT 119943  
CCGTGAGCGACTCGAAAAATTATAATTTTGGCCATTTTATGGGCGCCGCCATCTTGAAT  
CCGTGAGCGACTCGAAAAATTATAATTTTGGCCATTTTATGGGCGCCGCCATCTTGAAT  
ACCGTGAGCGACTCGAAAAATTATAATTTTGGCCATTTTCATGGGCGCCGCCATCTTGA

119942 TTGCTAATCCCCGTAATCCTCTGCCCTCTCCATT-GGTCCGCCGCCCCGTC AATCAA 119884  
TTGCTAATCCCCGTAATCCTCTGCCCTCTCCATT-GGTCCGCCGCCCCGTC AATCAA  
TTGCTAATCCCCGTAATCCTCTGCCCTCTCCATT-GGTCCGCCGCCCCGTC AATCAA  
TTTGCTAATCCCCGTAATCCTCTGCCCTCTCCATTGGTCCGCCGCCCCGTC AATCAA

119883 AGTTTTCCGAGCCGCCATTGGCCCATTCGGCCGACCAATCTCGTTCGAGCTAGGCGACCG 119824  
AGTTTTCCGAGCCGCCATTGGCCCATTCGGCCGACCAATCCCGTTCGAGCTAGGCGACCG  
AGTTTTCCGAGCCGCCATTGGCCCATTCGGCCGACCAATCCCGTTCGAGCTAGGCGACCG  
AGTTTTCCGAGCAGCCATTGGCCCATTCGGCCGACCAATCCCGTTCGAGCTAGGCGACCG

119823 CGCCATTCCATTGGACGCCCCAGCCGTCAATCAAATTCGGAGGCCCTCCCATTTGGCCCCA 119764  
CGCCATTCCATTGGACGCCCCAGCCGTCAATCAAATTCGGAGGCCCTCCCATTTGGCCCCA  
CGCCATTCCATTGGACGCCCCAGCCGTCAATCAAATTCGGAGGCCCTCCCATTTGGCCCCA  
CGCCATTCCATTGGACGCCCCAGCCGTCAATCAAATTCGGAGGCCCTCCCATTTGGCCCCA

119763 TCCCTAGAACTCCCAAGCTGATTGGCCACAGCGGGAACCAATCAGCGATTAGAGTTTTTG 119704  
TCCCTAGAACTCCCAAGCTGATTGGCCACAGCGGGAACCAATCAGCGATTAGAGTTTTTG  
TCCCTAGAACTCCCAAGCTGATTGGCCACAGCGGGAACCAATCAGCGATTAGAGTTTTTG  
TCCCTAGAACTCCCAAGCTGATTGGCCACAGCGGGAACCAATCAGCGATTAGAGTTTTTG

119703 TTTTGATTTTTTCTATATATATATATAATCCTTTAATCCTAGCGCAGCTGAGTCATCG 119644  
TTTTGATTTTTTCTATATATATATATAAATCCTTTAATCCTAGCGCAGCTGAGTCATCG  
TTTTGATTTTTTCTATATATATATATAAATCCTTTAATCCTAGCGCAGCTGAGTCATCG  
TTTTGATTTTTTCTATATATATATATAATCCTTTAATCCTAGCGCAGCTGAGTCATCG

119643 CAGCCCCTATTCCAGTAGGTATAACCCAGCTGGGTCTACCCAGCTGCGTAAACCCCGCTGC 119584  
CAGCCCCTATTCCAGTAGGTATAACCCAGCTGGGTCTACCCAGCTGCGTAAACCCCGCTGC  
CAGCCCCTATTCCAGTAGGTATAACCCAGCTGGGTCTACCCAGCTGCGTAAACCCCGCTGC  
CAGCCCCTATTCCAGTAGGTATAACCCAGCTGGGTAA-ATCCAG-TAGGTATACCCAGGTGG

miR-K9-5p

miR-K9-3p

119583 GTAAACACAGCTGGGTATAACCGAGCTGCGTAAACCCGGCTGGGTAAATCCAGCTG--TAA 119526  
GTAAACACAGCTGGGTATAACCGAGCTGCGTAAACCCGGCTGGGTAAATCCAGCTG--TAA  
GTAAACACAGCTGGGTATAACCGAGCTGCGTAAACCCGGCTGGGTAAATCCAGCTG--TAA  
GTGAACCCAGCTGGGTATAACCGAGCTGCGTAAACCCGGCTGGGTAAATCCAGCTGCGTAA

119525 TTCTACAATTAACAAGGTAT 119505  
TTCTACAATTAACAAGGTAT  
TTCTACAATTAACAAGGTAT  
TTCTACAATTAACAAGGTAT

Figure S4

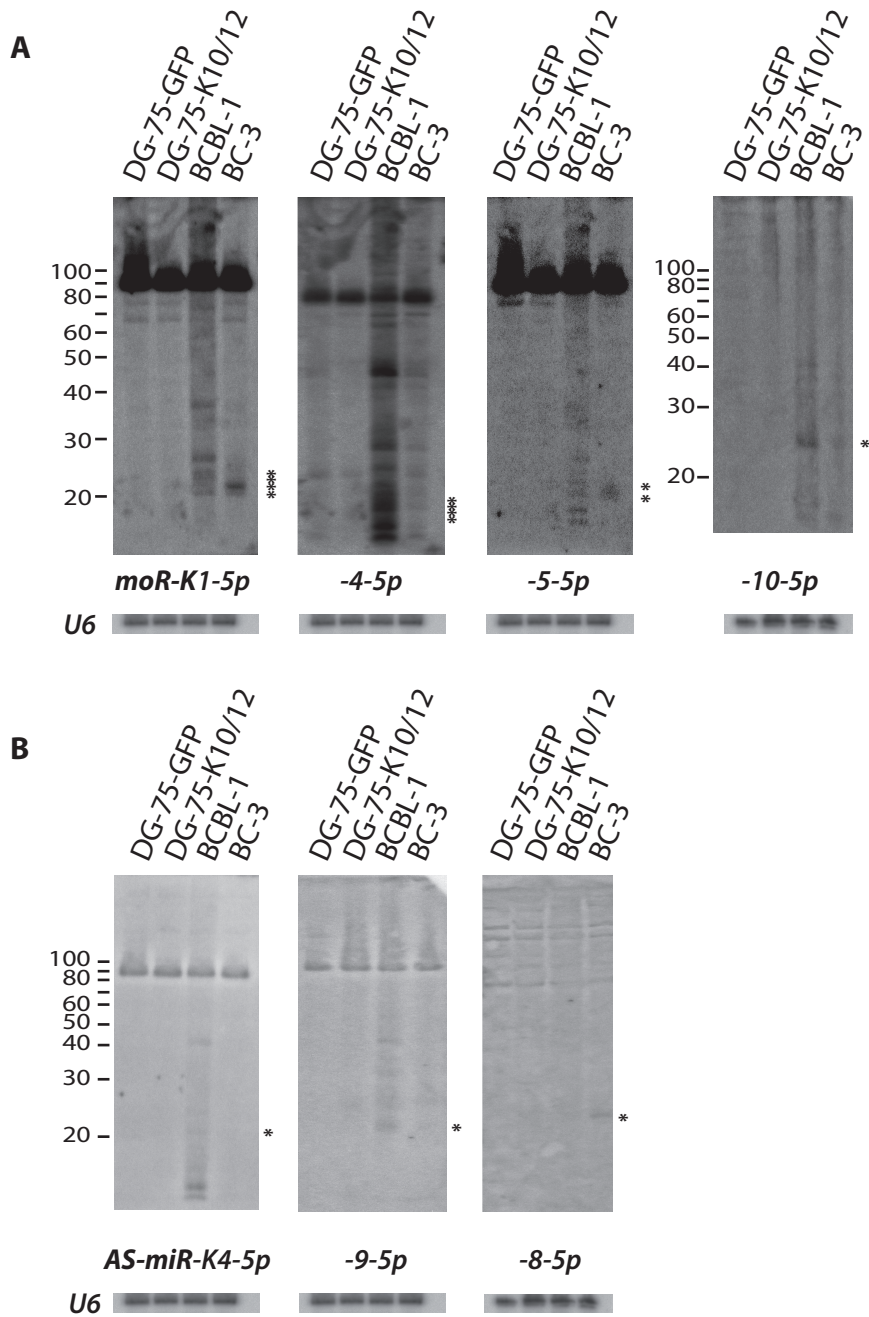

Supplement: supp_gku424_nar-03603-a-2013-File008.pdf [file supp_gku424_nar-03603-a-2013-File008.pdf]
